# Supplementary material
Source: Research Square preprint supplement (doi:10.21203/rs.3.rs-8765190/v1)
Supplement: Supplementary file 1 [file d307099cae8a522218401b6e.docx]

**Supplementary Material**

## A. Data Set

We utilize data from multiple sources to construct our analysis sample. First, we identify leading public universities in the United States. Specifically, we manually select 97 U.S. public universities from the list of 160 U.S. institutions that appear in the QS World University Rankings 2020 (QS).63 We then supplement this list by including additional institutions that do not appear in the QS rankings but are featured in the Wall Street Journal/Times Higher Education U.S. public university rankings.64 This process yields a total of 116 public universities for our study. For each university, we obtain salary data from the U.S. Public Employee Salary and Pension Records compiled by American Transparency (OpenTheBooks).65

Because salary data availability varies, we limit our analysis to the years 2017, 2018, and 2019, periods during which most universities report complete data. In some cases, salary data for campuses within the same university system are reported separately (e.g., University of Maryland, Baltimore County and University of Maryland, College Park), whereas others report data collectively at the system level. Accurate matching of salary data with research productivity data requires clear job title information. Institutions that do not provide job titles or provide only pension information without job titles further reduce our final sample to 69 universities. The database does not include information on federal academies for some states (e.g., Hawaii) and does not report information on several state public universities. Furthermore, for some institutions only pension data are available; we exclude such institutions from the sample.

For each institution in our sample, we manually identify the Scopus institution ID using Scopus Affiliations Search. Scopus is the largest abstract and citation database of peer-reviewed literature: scientific journals, books, and conference proceedings. Scopus Affiliation Search was accessed on 22/3/2021 at https://www.scopus.com. We manually screen search results to eliminate institutions registered outside the country or state where the institution is based (e.g., affiliated institutions abroad). We also manually exclude institutions that are erroneously displayed (e.g., if California State University is displayed among the results for University of California). Typically, institutions have multiple Scopus affiliation IDs for schools and departments, and we remove duplicates.

To identify individual authors affiliated with these institutions for 2017–2019, we implement an indirect method due to limitations with the Scopus API, identifying a total of 1,045,092 unique authors (Scopus IDs). For each author, we collect all name variations extracted from the variable “author names” appearing across their publications. In the next step, we match the payroll data and the institution-specific author lists separately for each institution. The match is based on the “Name” variable from the payroll database. Matching payroll data with author lists involves creating a standardized matching key by removing non-alphanumeric characters (including spaces) and converting names to lowercase. The newly created variable (Scopus name key) is subsequently used as a matching key.

To ensure the matching process is successful, we must guarantee the uniqueness of the matching key—Scopus ID. Scopus collects data provided by journal publications. Depending on the name format required by the journal or due to inconsistency on the author’s side, a single author may be linked to multiple name strings (e.g., James Smith and Jim Smith can both be the names for the same person). For matching, we use all name versions.

In our sample, we sometimes find multiple author IDs associated with a single name string. This can occur for two reasons. First, common names (e.g., John Smith) may be shared by multiple individuals. Second, errors in the Scopus data can split one author’s publication record across multiple IDs. Because we cannot determine with certainty why multiple matches arise in each case, we exclude any name key–Scopus author ID pairs that appear more than once. For example, suppose we observe the following matches: Jim Smith (ID 01), James Smith (ID 01), and James Smith (ID 02). In such a case, we drop all observations with names Jim Smith and James Smith and with Scopus IDs 01 and 02. Next, we match all remaining unique author name key–Scopus author ID pairs for each institution with the payroll data. Finally, for all Scopus author IDs matched with the payroll data, we obtain the full publication record via the Scopus API.

## B. Descriptive Statistics

Table B1 presents descriptive statistics for the full sample. Women account for 32% of the sample, consistent with persistent gender under-representation in academia. Salaries exhibit substantial right-skewness: the median faculty salary is $121,600, the mean salary is markedly higher at $143,617, reflecting a long upper tail driven by a relatively small group of very high-earning professors. The interquartile spread is also wide, indicating considerable heterogeneity in compensation.

Research output measures display even stronger dispersion. Faculty publish on average 39.9 papers, but the median is only 23, and the 75th percentile (50 publications) is five times the 25th percentile (10 publications). Log cumulative SJR scores show a similar pattern, with a mean of 38.14 versus a median of 19.31, and a large standard deviation of 60.13. Experience levels also vary meaningfully, with a median of 18 years since first publication and an interquartile range spanning from 11 to 28 years.

The rank distribution reflects a relatively balanced representation across positions, with 23% Assistant Professors, 29% Associate Professors, and 47% Full Professors. Field composition is driven primarily by Medical and Health Sciences (31%) and Natural Sciences (28%), followed by Social Sciences (24%). Agricultural Sciences, Engineering and Technology, and Humanities together account for less than 20% of the sample, underscoring the dominance of STEM-oriented disciplines.

Table B2 presents substantial variation in academic characteristics across fields, revealing both discipline-specific norms and broad structural patterns. Salaries vary widely, ranging from averages near $108,000 in the Humanities to above $162,000 in Medical and Health Sciences, with extreme upper tails in the latter. Research output also differs sharply by discipline: publication counts and cumulative SJR scores are modest in the Humanities and Social Sciences but exceedingly high in the Natural Sciences and Medical and Health Sciences, where the most productive scholars exceed 800–1,600 cumulative SJR points. Experience distributions further reflect field-specific career structures, with longer publication histories in the Natural Sciences and Agricultural Sciences, and shorter trajectories in the Humanities.

The proportion of women also differs markedly across fields, highlighting persistent patterns of occupational segregation. Representation is highest in the Humanities and Social Sciences, where women constitute roughly 40–44% of authors, and lowest in Engineering and Technology and in Economics-related subfields, where female representation ranges from 16–22%. Despite differences in magnitude, each field exhibits wide dispersion in salary and research output, indicating substantial heterogeneity in academic careers within disciplines.

Across all scientific domains examined, the descriptive statistics in Table B2 reveal systematic gender gaps in key dimensions of academic careers, including salary, research output, and experience. These discrepancies are not confined to a single field; rather, they appear as a pervasive structural pattern affecting women across the entire spectrum of the academic workforce. The magnitude of these differences, paired with large and statistically significant t-statistics, suggests that they are not attributable to random variation but reflect deeply rooted and persistent inequalities.

In the Agricultural Sciences, women earn substantially lower salaries than men and exhibit markedly lower research productivity. Female academics publish, on average, 15 fewer articles than their male colleagues, produce roughly one-third less cumulative SJR-weighted output, and have over four fewer years of research experience. These gaps in experience, output, and reward already point to a cumulative disadvantage at early career stages, compounding over time through slower progression and reduced access to high-prestige collaborations.

Gender disparities intensify in Engineering and Technology, a field historically characterized by pronounced occupational segregation. Here, women earn nearly $17,300 less than men despite facing comparable levels of salary dispersion, and their publication and cumulative SJR metrics lag considerably behind. The experience differential of nearly six years underscores a persistent underrepresentation of women, especially at senior levels.

In the Humanities, where overall publication expectations are lower, the gender gap remains pronounced but narrower in magnitude. Women publish fewer articles, accumulate substantially lower SJR scores, and report about 2.6 fewer years of research experience relative to their male peers. Even within fields traditionally perceived as more gender-balanced, the disparities suggest that structural and evaluative biases continue to shape academic trajectories.

The Medical and Health Sciences exhibit some of the largest discrepancies observed. Women earn, on average, almost $40,000 less than men and show significant shortfalls in publication output and cumulative research impact. The differences in publication count (–22.8) and SJR score (–22.9) are among the largest across all fields, matched by an experience gap exceeding five years. A similar pattern emerges in the Natural Sciences, where women face both lower pay (–$13,759) and substantially reduced research output. The publication and SJR gaps remain large (–19.5 and –20.1, respectively), accompanied by shorter research careers. The Social Sciences also show stark inequalities across all variables. Salary differences exceed $31,000, and women publish significantly fewer articles and accumulate less than half the cumulative SJR score of men. Taken together, these descriptive patterns highlight a systemic and cross-disciplinary gender imbalance that persists even at advanced career stages.

**Table B1. Descriptive Statistics**

|  | Mean | Std.dev | Q25 | Median | Q75 |
| --- | --- | --- | --- | --- | --- |
| Female | 0.32 | 0.47 | 0.00 | 0.00 | 1.00 |
| Salary (in $) | 143617 | 88473 | 90557 | 121600 | 174100 |
| Publication count | 39.90 | 52.03 | 10.00 | 23.00 | 50.00 |
| Log cumulative SJR score | 38.14 | 60.13 | 6.27 | 19.31 | 45.85 |
| Experience (in years) | 19.80 | 11.47 | 11.00 | 18.00 | 28.00 |
| Position:  Assistant Professor | 0.23 | 0.42 | 0.00 | 0.00 | 0.00 |
| Associate Professor | 0.29 | 0.45 | 0.00 | 0.00 | 1.00 |
| Full Professor | 0.47 | 0.50 | 0.00 | 0.00 | 1.00 |
| Field:  Agricultural Sciences | 0.07 | 0.26 | 0.00 | 0.00 | 0.00 |
| Engineering and  Technology | 0.06 | 0.25 | 0.00 | 0.00 | 0.00 |
| Humanities | 0.04 | 0.19 | 0.00 | 0.00 | 0.00 |
| Medical and Health Sciences | 0.31 | 0.46 | 0.00 | 0.00 | 1.00 |
| Natural Sciences | 0.28 | 0.45 | 0.00 | 0.00 | 1.00 |
| Social Sciences | 0.24 | 0.43 | 0.00 | 0.00 | 0.00 |

*Notes*: Experience (in years) is defined as the time elapsed since an author’s first publication recorded in Scopus. The cumulative SJR score is weighted by the inverse of the square root of the number of co-authors for each publication.

**Table B2. Descriptive Statistics by Field**

|  | N | Mean | Std.dev | Min | Q25 | Median | Q75 | Max |
| --- | --- | --- | --- | --- | --- | --- | --- | --- |
|  |  |  | Agricultural Sciences | | |  |  |  |
| Female | 5355 | 0.30 | 0.46 | 0.00 | 0.00 | 0.00 | 1.00 | 1.00 |
| Salary (in $) | 5355 | 121218.87 | 45504.42 | 20654.50 | 91333.08 | 114216.00 | 143096.00 | 500001.00 |
| Publication count | 5355 | 45.00 | 39.84 | 0.00 | 19.00 | 35.00 | 61.00 | 584.00 |
| Cumulative SJR score | 5355 | 31.24 | 38.67 | 0.00 | 8.81 | 20.38 | 38.33 | 689.16 |
| Experience | 5355 | 21.41 | 10.44 | -1.00 | 13.00 | 21.00 | 29.00 | 54.00 |
|  |  |  | Engineering and Technology | | |  |  |  |
| Female | 4727 | 0.16 | 0.36 | 0.00 | 0.00 | 0.00 | 0.00 | 1.00 |
| Salary (in $) | 4727 | 146126.69 | 61294.34 | 20799.00 | 104990.76 | 132568.00 | 175489.00 | 470783.00 |
| Publication count | 4727 | 49.39 | 55.84 | 0.00 | 17.00 | 33.00 | 61.00 | 709.00 |
| Cumulative SJR score | 4727 | 40.06 | 56.38 | 0.00 | 10.58 | 23.25 | 47.79 | 661.83 |
| Experience | 4727 | 20.72 | 11.58 | -2.00 | 11.00 | 19.00 | 29.00 | 60.00 |
|  |  |  | Humanities | |  |  |  |  |
| Female | 2773 | 0.44 | 0.50 | 0.00 | 0.00 | 0.00 | 1.00 | 1.00 |
| Salary (in $) | 2773 | 108452.80 | 43769.55 | 20606.44 | 78600.14 | 97340.14 | 127327.00 | 320257.00 |
| Publication count | 2773 | 6.36 | 9.11 | 0.00 | 2.00 | 4.00 | 7.00 | 153.00 |
| Cumulative SJR score | 2773 | 3.60 | 7.88 | 0.00 | 0.36 | 0.84 | 3.35 | 139.72 |
| Experience | 2773 | 14.71 | 10.30 | -2.00 | 7.00 | 12.00 | 20.00 | 56.00 |
|  |  |  | Medical and Health Sciences | | |  |  |  |
| Female | 22149 | 0.38 | 0.49 | 0.00 | 0.00 | 0.00 | 1.00 | 1.00 |
| Salary (in $) | 22149 | 162407.40 | 124737.78 | 20022.00 | 85509.00 | 128000.04 | 208134.96 | 1965689.00 |
| Publication count | 22149 | 45.22 | 56.40 | 0.00 | 11.00 | 26.00 | 58.00 | 862.00 |
| Cumulative SJR score | 22149 | 38.19 | 59.55 | 0.00 | 5.66 | 18.22 | 46.02 | 1004.48 |
| Experience | 22149 | 19.43 | 11.51 | 0.00 | 10.00 | 18.00 | 27.00 | 68.00 |
|  |  |  | Natural Sciences | | |  |  |  |
| Female | 20352 | 0.20 | 0.40 | 0.00 | 0.00 | 0.00 | 0.00 | 1.00 |
| Salary (in $) | 20352 | 137560.45 | 62260.49 | 20069.00 | 96553.75 | 123685.83 | 165113.23 | 804701.40 |
| Publication count | 20352 | 53.84 | 61.84 | 0.00 | 19.00 | 35.00 | 66.00 | 1253.00 |
| Cumulative SJR score | 20352 | 58.39 | 77.90 | 0.00 | 16.45 | 35.72 | 71.51 | 1690.19 |
| Experience | 20352 | 23.00 | 11.27 | -1.00 | 14.00 | 22.00 | 31.00 | 66.00 |
|  |  |  | Social Sciences | | |  |  |  |
| Female | 17803 | 0.41 | 0.49 | 0.00 | 0.00 | 0.00 | 1.00 | 1.00 |
| Salary (in $) | 17803 | 138344.47 | 73883.09 | 20371.65 | 87206.00 | 117200.18 | 169134.50 | 1095794.14 |
| Publication count | 17803 | 19.40 | 24.79 | 0.00 | 6.00 | 12.00 | 23.00 | 465.00 |
| Cumulative SJR score | 17803 | 22.92 | 35.05 | 0.00 | 3.86 | 10.59 | 26.99 | 497.03 |
| Experience | 17803 | 17.11 | 11.15 | -2.00 | 8.00 | 15.00 | 24.00 | 60.00 |

**Table B3. Descriptive Statistics by Gender and Field**

| Variable | Female  Mean Std. Dev. | | Male  Mean Std Dev. | | Difference | T-statistic |
| --- | --- | --- | --- | --- | --- | --- |
| Agricultural Sciences | | | | | | |
| Salary (in $) | 116651.89 44300.21 123219.06 | | | 45884.82 | -6567.17 | -4.94 |
| Publication Count | 34.58 | 29.91 | 49.56 | 42.69 | -14.98 | -14.71 |
| Cumulative SJR score | 23.76 | 26.48 | 34.52 | 42.52 | -10.75 | -11.24 |
| Experience (in years) | 18.48 | 9.65 | 22.69 | 10.51 | -4.21 | -14.29 |
| Salary (in $) | Engineering and Technology  131558.10 55600.30 148822.01 61922.54 | | | | -17263.90 | -7.61 |
| Publication Count | 36.36 | 52.18 | 51.79 | 56.17 | -15.43 | -7.29 |
| Cumulative SJR score | 27.58 | 45.56 | 42.36 | 57.87 | -14.79 | -7.74 |
| Experience (in years) | 15.79 | 10.36 | 21.63 | 11.57 | -5.84 | -13.81 |
| Humanities | | | | | | |
| Salary (in $) | 104202.68 | 40843.98 | 111796.49 | 45676.20 | -7593.80 | -4.61 |
| Publication Count | 4.98 | 6.38 | 7.43 | 10.66 | -2.45 | -7.51 |
| Cumulative SJR score | 2.38 | 4.66 | 4.57 | 9.58 | -2.19 | -7.88 |
| Experience (in years) | 13.23 | 9.10 | 15.86 | 11.02 | -2.63 | -6.89 |
| Medical and Health Sciences | | | | | | |
| Salary (in $) | 137983.76 | 89596.41 | 177426.64 | 139999.19 | -39442.89 | -25.56 |
| Publication Count | 31.08 | 39.25 | 53.92 | 63.17 | -22.84 | -33.19 |
| Cumulative SJR score | 24.03 | 38.91 | 46.90 | 67.80 | -22.87 | -31.89 |
| Experience (in years) | 16.22 | 10.12 | 21.40 | 11.86 | -5.19 | -34.66 |
| Natural Sciences | | | | | | |
| Salary (in $) | 126519.13 | 55938.38 | 140278.19 | 63427.99 | -13759.06 | -13.59 |
| Publication Count | 38.19 | 40.66 | 57.69 | 65.44 | -19.50 | -23.76 |
| Cumulative SJR score | 42.26 | 49.87 | 62.35 | 82.89 | -20.09 | -19.70 |
| Experience (in years) | 20.16 | 10.09 | 23.70 | 11.44 | -3.54 | -19.40 |
| Social Sciences | | | | | | |
| Salary (in $) | 119942.86 | 58586.63 | 150989.47 | 80367.70 | -31046.61 | -29.80 |
| Publication Count | 15.85 | 19.65 | 21.84 | 27.51 | -6.00 | -16.97 |
| Cumulative SJR score | 15.29 | 22.80 | 28.17 | 40.60 | -12.88 | -26.99 |
| Experience (in years) | 15.16 | 9.97 | 18.45 | 11.70 | -3.28 | -20.11 |

*Notes*: Experience (in years) - time from the first Scopus-reported publication, Cumulative SJR score is discounted by the square root of the number of authors.

**C. Robustness Checks**

**C.1. Gender Pay Gap and Gender Gap in Returns to Publications Across Fields**

Significant differences in female-to-male ratios, compensation, and research productivity across academic fields can influence the size of the gender pay gap and the gap in returns to publications, as noted in previous sections. To begin with, we focus on the gender pay gap and show that it varies across the six broad academic fields (agricultural sciences, engineering and technology, humanities, medical and health sciences, natural sciences, social sciences), extending previous studies investigating gender disparities in pay.66, for instance, finds that a salary gap exists in the sciences. However, using the same survey data,67 report that salary differences between men and women in the humanities are not statistically significant.

Building upon these prior findings, we observe that although the gender pay gap varies by academic field, it remains negative and statistically significant when research productivity is not accounted for. Specifically, Column 1 of Table C1, which employs a pooled specification including only year and broad field fixed effects, reveals gender pay gaps disadvantageous to women ranging from 5.5% in agricultural sciences to 20.9% in social sciences. Humanities, natural sciences, engineering and technology, and medical and health sciences exhibit pay gaps of 6.4%, 9.6%, 12.3%, and 17.8%, respectively. Our findings align with those of 68, who document that college-educated women frequently select academic majors linked to systematically lower wages compared to their male counterparts.

However, when productivity and its interaction with academic fields are introduced (Columns 3 and 4), the magnitude of the gap changes significantly in many fields. Notably, it becomes insignificant in agricultural sciences and humanities. Across the four pooled specifications, the R2 does not exceed 21.5%, underscoring the need for models with better fit. Column 5 of Table C1 shows that the R2 rises sharply to 85.8% under a correlated random effects model that incorporates individual fixed effects, identified through unique Scopus IDs. Although the gender pay gap remains statistically significant for each field, its economic size changes compared to the pooled model without individual fixed effects. For instance, social sciences still exhibit the largest gap, 12.9%, yet individual productivity can mitigate that gap.

**Table C1. Gender Pay Gap Across Fields**

|  | Pooled (1) | Pooled (2) | Pooled (3) | Pooled (4) | CRE (5) | CRE (6) |
| --- | --- | --- | --- | --- | --- | --- |
| Female x  x Agricultural Sciences | -0.055***  (0.011) | -0.097***  (0.011) | -0.016  (0.010) | -0.018 (0.027) | -0.022  (0.020) | -0.068  (0.050) |
| x Engineering and Technology | -0.123***  (0.016) | -0.100***  (0.016) | -0.037**  (0.014) | -0.104**  (0.038) | -0.064*  (0.028) | -0.139*  (0.066) |
| x Humanities | -0.064***  (0.014) | -0.101***  (0.013) | -0.012  (0.013) | -0.012 (0.017) | 0.024  (0.023) | 0.060 (0.031) |
| x Medical and Health Sciences | -0.178***  (0.009) | -0.119***  (0.008) | -0.023**  (0.008) | 0.065***  (0.018) | -0.053***  (0.009) | 0.042*  (0.019) |
| x Natural Sciences | -0.096***  (0.007) | -0.087***  (0.007) | -0.037***  (0.006) | -0.165***  (0.021) | -0.069***  (0.012) | -0.200***  (0.035) |
| x Social Sciences | -0.209***  (0.007) | -0.109***  (0.006) | -0.055***  (0.006) | -0.057***  (0.012) | -0.129***  (0.010) | -0.113***  (0.020) |
| Productivity x  x Agricultural Sciences |  |  | 0.167***  (0.003) | 0.168***  (0.004) | 0.120***  (0.035) | 0.068  (0.046) |
| x Engineering and Technology |  |  | 0.183***  (0.003) | 0.182***  (0.003) | 0.158***  (0.033) | 0.152***  (0.037) |
| x Humanities |  |  | 0.176***  (0.008) | 0.177***  (0.009) | 0.102 (0.060) | 0.179* (0.082) |
| x Medical and Health Sciences |  |  | 0.175***  (0.003) | 0.181***  (0.003) | 0.328***  (0.017) | 0.378***  (0.022) |
| x Natural Sciences |  |  | 0.173***  (0.002) | 0.173***  (0.002) | 0.135***  (0.021) | 0.116***  (0.024) |
| x Social Sciences |  |  | 0.178***  (0.002) | 0.179***  (0.003) | 0.084***  (0.014) | 0.069***  (0.019) |
| Female x Productivity x  x Agricultural Sciences |  |  |  | 0.001  (0.010) |  | 0.124  (0.069) |
| x Engineering and Technology |  |  |  | 0.025*  (0.013) |  | 0.029  (0.082) |
| x Humanities |  |  |  | 0.002  (0.017) |  | -0.165  (0.120) |
| x Medical and Health Sciences |  |  |  | -0.035***  (0.006) |  | -0.107*** (0.031) |
| x Natural Sciences |  |  |  | 0.040***  (0.006) |  | 0.083  (0.048) |
| x Social Sciences |  |  |  | 0.002  (0.005) |  | 0.033  (0.028) |
| Num. Obs. | 76089 | 76089 | 76089 | 76089 | 76089 | 76089 |
| R2 | 0.032 | 0.098 | 0.214 | 0.215 | 0.858 | 0.858 |
| FE: Year | X | X | X | X | X | X |
| FE: Broad Field | X |  |  |  |  |  |
| FE: Narrow Field |  | X | X | X | X | X |
| FE: Scopus ID |  |  |  |  | X | X |

*Notes:* + p < 0.1, * p < 0.05, ** p < 0.01, *** p < 0.001. Standard errors in parentheses.

Finally, we investigate whether there is a gender gap in returns to publications in certain fields. Column 6 includes an interaction term between the female indicator and productivity, revealing substantial variation across fields. In medical and health sciences, female faculty members earn 10.7% less than their male counterparts for identical research output, rejecting the null hypothesis of no discrimination. Other fields show no statistically significant differences. Taken together, these results explain why no discrimination in returns to publications is detected in the aggregate sample across all disciplines, while also highlighting the importance of discipline-specific analyses for understanding the gender pay gap and the gender gap in returns to publications.

**C.2. Gender Pay Gap Across Experience Groups**

We further explore how the gender pay gap varies by rank, experience, and productivity.

Columns 1 and 2 of Table C2 reveal that women in lower academic ranks face a larger pay gap. Because Column 2 controls for individual characteristics, it has a substantially higher explanatory power, as indicated by R2 of 85.7%. It shows that female assistant professors earn 7.7% less than their male counterparts, and female associate professors earn 4.7% less. Likewise, female full professors earn 2.9% less than male full professors, even though the proportion of women at senior ranks is substantially smaller than at junior levels. A decreasing gender gap for more senior faculty is in line with16, who show that women perform better in terms of salary progression after promotion. Intriguingly, results in Column 6 suggest that controlling for individual characteristics, the gender pay gap diminishes progressively with faculty experience and eventually vanishes for faculty with more than 35 years in academia, implying that discrimination is more pronounced early

in academic careers.

Next, we perform an analogous sensitivity analysis of returns to publications. To assess the role of productivity, we divide the sample into halves based on SJR scores. H1 denotes scholars in the top half of the productivity distribution (higher productivity), while H2 denotes scholars in the bottom half of the productivity distribution (lower productivity). Column 2 shows significant returns for assistant and associate professors, yet none for full professors, potentially reflecting career-family trade-offs or movement into non-academic opportunities for the most productive scholars. Columns 3 and 4 of Table C2 indicate that the largest pay gaps in returns to publications of 9.4% and 8.9%, respectively, without and with controls for individual characteristics, occur among the least productive half of researchers. The analysis controls for narrow research fields with fixed effects for each of nearly 300 different sub-disciplines and individual characteristics, so at least part of the gap can be attributed to discrimination. Finally, Column 6 controls for individual characteristics and indicates that returns to productivity grow during the first 20 years of experience but turn negative after 35 years, which could stem from age-related discrimination or other factors.

**Table C2. Gender Pay Gap Across Experience Groups**

|  | | Pooled  (1) | CRE  (2) | | Pooled  (3) | | CRE  (4) | | Pooled  (5) | CRE  (6) |
| --- | --- | --- | --- | --- | --- | --- | --- | --- | --- | --- |
| Female × Assistant Professor | | -0.055***  (0.007) | -0.077***  (0.010) | |  | |  | |  |  |
| Female × Associate Professor | | -0.017**  (0.006) | -0.047***  (0.010) | |  | |  | |  |  |
| Female × Full  Professor | | -0.005  (0.006) | -0.029**  (0.009) | |  | |  | |  |  |
| Productivity × Assistant Professor | | 0.049***  (0.003) | 0.177***  (0.011) | |  | |  | |  |  |
| Productivity × Associate Professor | | 0.080***  (0.003) | 0.174***  (0.023) | |  | |  | |  |  |
| Productivity × Full Professor | | 0.115***  (0.002) | -0.041  (0.031) | |  | |  | |  |  |
| Female × Productivity H1 | |  |  | | -0.094***  (0.014) | | -0.089***  (0.009) | |  |  |
| Female × Productivity H2 | |  |  | | 0.011  (0.023) | | -0.049***  (0.010) | |  |  |
| **Productivity × H1** | |  |  | | 0.101***  (0.004) | | 0.174***  (0.012) | |  |  |
| **Productivity × H2** | |  |  | | 0.213***  (0.004) | | 0.109***  (0.028) | |  |  |
| **Female × Experience**  **< 5 Y** | |  |  | |  | |  | | −0.042***  (0.011) | −0.073***  (0.016) |
| **Female × Experience**  **5–9 Y** | |  |  | |  | |  | | −0.052***  (0.009) | −0.083***  (0.013) |
| **Female × Experience 10–14 Y** | |  |  | |  | |  | | −0.007  (0.009) | −0.036*  (0.014) |
| **Female × Experience 15–19 Y** | |  |  | |  | |  | | −0.041***  (0.009) | −0.071***  (0.015) |
| **Female × Experience 20–24 Y** | |  |  | |  | |  | | −0.016  (0.011) | −0.046**  (0.017) |
| **Female × Experience 25–29 Y** | |  |  | |  | |  | | −0.031*  (0.012) | −0.063***  (0.019) |
| **Female × Experience 30–34 Y** | |  |  | |  | |  | | −0.012  (0.015) | −0.051*  (0.022) |
| **Female × Experience 35–39 Y** | |  |  | |  | |  | | −0.037  (0.021) | −0.051  (0.031) |
| **Female × Experience**  **> 40 Y** | |  |  | |  | |  | | 0.075**  (0.026) | 0.047  (0.039) |
| **Productivity × Experience**  **< 5 Y** | |  |  | |  | |  | | 0.098*** (0.006) | 0.141*** (0.013) |
| **Productivity × Experience**  **5–10 Y** | |  |  | |  | |  | | 0.076*** (0.004) | 0.216*** (0.018) |
| **Productivity × Experience**  **10–15 Y** | |  |  | |  | |  | | 0.104*** (0.004) | 0.201*** (0.025) |
| **Productivity × Experience 15–20 Y** |  | |  |  | |  | | 0.130***  (0.004) | | 0.194*** (0.035) |
| **Productivity × Experience 20–25 Y** |  | |  |  | |  | | 0.143*** (0.005) | | 0.063  (0.050) |
| **Productivity × Experience 25–30 Y** |  | |  |  | |  | | 0.155*** (0.006) | | −0.017  (0.064) |
| **Productivity × Experience 30–35 Y** |  | |  |  | |  | | 0.173*** (0.006) | | −0.145  (0.085) |
| **Productivity × Experience 35–40 Y** |  | |  |  | |  | | 0.174*** (0.008) | | −0.545*** (0.129) |
| **Productivity × Experience**  **> 40 Y** |  | |  |  | |  | | 0.197*** (0.009) | | −1.145*** (0.186) |
| **Num. obs.** | 76,173 | | 76,173 | 76,173 | | 76,173 | | 76,173 | | 76,173 |
| **R²** | 0.286 | | 0.857 | 0.227 | | 0.858 | | 0.235 | | 0.858 |
| **FE : Position** | X | | X |  | |  | |  | |  |
| **FE : Top/Bottom Half** |  | |  | X | | X | |  | |  |
| **FE : Experience Group** |  | |  |  | |  | | X | | X |
| **FE : Narrow Category** | X | | X | X | | X | | X | | X |
| **FE : Scopus ID** |  | | X |  | | X | |  | | X |
| **FE : Year** | X | | X | X | | X | | X | | X |

*Notes:* + p < 0.1, * p < 0.05, ** p < 0.01, *** p < 0.001. Standard errors in parentheses.

**C.3. Gender Pay Gap Across Lags**

Because academic research may not translate into monetary rewards immediately, we construct robustness checks using lagged SJR performance measures. Table [C3](#_bookmark2) shows that the results remain qualitatively unchanged, with no visible gender gap in returns to productivity. These results hold consistently for lag structures of one, two, and three years. Furthermore, the coefficient on productivity diminishes with longer lags, suggesting that salary rewards tend to materialize within the first few years following publication.

**Table C3. Gender Pay Gap Across Lags**

|  | Pooled  (1) | CRE  (2) | Pooled  (3) | CRE  (4) | Pooled  (5) | CRE  (6) |
| --- | --- | --- | --- | --- | --- | --- |
| Female | −0.025** | −0.058*** | −0.026** | −0.059*** | −0.028*** | −0.062*** |
|  | (0.009) | (0.013) | (0.009) | (0.012) | (0.008) | (0.012) |
| Productivity (Lag 1) | 0.174*** | 0.133*** |  |  |  |  |
|  | (0.002) | (0.011) |  |  |  |  |
| Female × Productivity (Lag 1) | −0.003 | 0.006 |  |  |  |  |
|  | (0.003) | (0.015) |  |  |  |  |
| Productivity (Lag 2) |  |  | 0.171*** | 0.100*** |  |  |
|  |  |  | (0.002) | (0.010) |  |  |
| Female × Productivity (Lag 2) |  |  | −0.003 | −0.003 |  |  |
|  |  |  | (0.003) | (0.014) |  |  |
| Productivity (Lag 3) |  |  |  |  | 0.168*** | 0.102*** |
|  |  |  |  |  | (0.002) | (0.009) |
| Female × Productivity (Lag 3) |  |  |  |  | −0.002 | 0.001 |
|  |  |  |  |  | (0.003) | (0.014) |
| Num. Obs. | 76,173 | 76,173 | 76,173 | 76,173 | 76,173 | 76,173 |
| Adj. R² | 0.216 | 0.857 | 0.218 | 0.857 | 0.221 | 0.857 |
| FE: Year | X | X | X | X | X | X |
| FE: Broad Field | X | X | X | X | X | X |

*Notes:* + p < 0.1, * p < 0.05, ** p < 0.01, *** p < 0.001. Standard errors in parentheses.

**D. Matching and Weighting**

**Table D1. Balancing after Matching and Weighting**

|  | CEM | | NN | | NNR | | IPW | |
| --- | --- | --- | --- | --- | --- | --- | --- | --- |
|  | Female | Male | Female | Male | Female | Male | Female | Male |
| **Log cumulative SJR score** | 2.356 | 2.360 | 2.343 | 2.395 | 2.343 | 2.347 | 2.343 | 2.335 |
| **Experience (in years)** | 15.475 | 15.463 | 15.592 | 15.742 | 15.592 | 15.482 | 15.592 | 15.473 |
| **Position:** |  |  |  |  |  |  |  |  |
| Assistant Professor | 0.331 | 0.331 | 0.331 | 0.326 | 0.331 | 0.333 | 0.331 | 0.334 |
| Associate Professor | 0.326 | 0.326 | 0.326 | 0.325 | 0.326 | 0.324 | 0.326 | 0.326 |
| Full Professor | 0.343 | 0.343 | 0.342 | 0.349 | 0.342 | 0.342 | 0.342 | 0.340 |
| **Field:** |  |  |  |  |  |  |  |  |
| Agricultural Sciences | 0.064 | 0.064 | 0.068 | 0.068 | 0.068 | 0.066 | 0.068 | 0.068 |
| Engineering and Technology | 0.030 | 0.030 | 0.032 | 0.032 | 0.032 | 0.033 | 0.032 | 0.032 |
| Humanities | 0.046 | 0.046 | 0.050 | 0.052 | 0.050 | 0.048 | 0.050 | 0.050 |
| Medical and Health Sciences | 0.369 | 0.369 | 0.365 | 0.361 | 0.365 | 0.368 | 0.365 | 0.364 |
| Natural Sciences | 0.173 | 0.173 | 0.171 | 0.172 | 0.171 | 0.171 | 0.171 | 0.172 |
| Social Sciences | 0.318 | 0.318 | 0.314 | 0.315 | 0.314 | 0.315 | 0.314 | 0.314 |

*Notes:* Experience (in years) - time from the first Scopus-reported publication. Matching methods: CEM (Coarsened Exact Matching), NN (Nearest Neighbour), NNR (Nearest Neighbour with Replacement), IPW (Inverse Probability Weighting).

**Table D2. Robustness: Matching and Weighting with salary as a matching variable**

| Variable | CEM  (1) | NN  (2) | NNR  (3) | IPW  (4) |
| --- | --- | --- | --- | --- |
| **Female** | −0.035** | −0.077*** | −0.073*** | −0.062*** |
|  | (0.012) | (0.013) | (0.015) | (0.012) |
| **Productivity** | 0.147*** | 0.158*** | 0.129*** | 0.186*** |
|  | (0.012) | (0.015) | (0.016) | (0.011) |
| **Female × Productivity** | −0.014 | −0.029 | −0.011 | −0.057*** |
|  | (0.017) | (0.019) | (0.020) | (0.015) |
| **Num. obs.** | 53,652 | 49,381 | 41,204 | 76,089 |
| **R²** | 0.827 | 0.850 | 0.845 | 0.893 |
| **FE: Scopus ID** | X | X | X | X |
| **FE: Year** | X | X | X | X |
| **FE: University** | X | X | X | X |

*Notes:* + p < 0.1, * p < 0.05, ** p < 0.01, *** p < 0.001. Standard errors in

parentheses. All regression results obtained using a CRE model.

**Table D3. Balancing after Matching and Weighting including Salary**

|  | CEM | | NN | | NNR | | IPW | |
| --- | --- | --- | --- | --- | --- | --- | --- | --- |
|  | Female | Male | Female | Male | Female | Male | Female | Male |
| **Log salary at t = 1** | 11.611 | 11.611 | 11.582 | 11.600 | 11.582 | 11.584 | 11.582 | 11.576 |
| **Log cumulative SJR score** | 2.421 | 2.424 | 2.343 | 2.407 | 2.343 | 2.337 | 2.343 | 2.336 |
| **Experience (in years)** | 15.395 | 15.375 | 15.592 | 15.780 | 15.592 | 15.399 | 15.592 | 15.489 |
|  |  |  |  |  |  |  |  |  |
| **Position** |  |  |  |  |  |  |  |  |
| Assistant Professor | 0.336 | 0.336 | 0.331 | 0.325 | 0.331 | 0.334 | 0.331 | 0.333 |
| Associate Professor | 0.324 | 0.324 | 0.326 | 0.332 | 0.326 | 0.329 | 0.326 | 0.326 |
| Full Professor | 0.340 | 0.340 | 0.342 | 0.342 | 0.342 | 0.337 | 0.342 | 0.340 |
|  |  |  |  |  |  |  |  |  |
| **Field** |  |  |  |  |  |  |  |  |
| Agricultural Sciences | 0.057 | 0.057 | 0.068 | 0.071 | 0.068 | 0.070 | 0.068 | 0.068 |
| Engineering and Technology | 0.027 | 0.027 | 0.032 | 0.032 | 0.032 | 0.033 | 0.032 | 0.032 |
| Humanities | 0.043 | 0.043 | 0.050 | 0.051 | 0.050 | 0.049 | 0.050 | 0.050 |
| Medical and Health Sciences | 0.359 | 0.359 | 0.365 | 0.363 | 0.365 | 0.362 | 0.365 | 0.366 |
| Natural Sciences | 0.187 | 0.187 | 0.171 | 0.173 | 0.171 | 0.175 | 0.171 | 0.172 |
| Social Sciences | 0.327 | 0.327 | 0.314 | 0.310 | 0.314 | 0.311 | 0.314 | 0.313 |

*Notes:* Experience (in years) - time from the first Scopus-reported publication.

Matching methods: CE (Coarsened Exact Matching), NN (Nearest Neighbour), NNR (Nearest Neighbour with Replacement), IPW (Inverse Probability Weighting).
